# Supplementary material for: Differential Gene Expression Associated with Altered Isoflavone and Fatty Acid Contents in Soybean Mutant Diversity Pool
Source: MDPI journal article supplement (doi:10.3390/plants10061037), 2021-05-21
Supplement: s1 [file s1]

Table S2. Fatty acid content in the seeds of 208 soybean MDP lines.

| NO. | Lines        | 16:0  | 18:0  | 18:1  | 18:2  | 18:3  |
|-----|--------------|-------|-------|-------|-------|-------|
| 1   | 94seori      | 15.26 | 3.83  | 14.98 | 56.03 | 9.9   |
| 2   | Joseangseori | 17.92 | 2.22  | 10.59 | 61.03 | 8.24  |
| 3   | J-S          | 17.88 | 3.11  | 9.67  | 62.43 | 6.91  |
| 4   | J-D01        | 15.93 | 2.61  | 9.55  | 63.9  | 8.01  |
| 5   | J-D02        | 17.01 | 3.5   | 12.45 | 57.94 | 9.1   |
| 6   | KAS360-22    | 18.89 | 22.99 | 2.25  | 50.59 | 5.28  |
| 7   | KAS360-22-W  | 15.37 | 3.66  | 12.13 | 59    | 9.84  |
| 8   | BangSa       | 17.94 | 3.39  | 4.57  | 64.96 | 9.14  |
| 9   | BS-25        | 19.03 | 2.81  | 4.11  | 62.47 | 11.58 |
| 10  | BS-63        | 18.67 | 3.08  | 5.99  | 62.18 | 10.08 |
| 11  | BS-73        | 17.57 | 3.23  | 9.16  | 58.83 | 11.21 |
| 12  | BS-74        | 18.54 | 2.86  | 6.66  | 60.95 | 10.99 |
| 13  | BS-84        | 17.78 | 3.26  | 8.38  | 59.81 | 10.77 |
| 14  | PalDal       | 16.19 | 3.58  | 16.95 | 55.51 | 7.77  |
| 15  | P-D01        | 16.25 | 2.96  | 10.62 | 61.16 | 9.01  |
| 16  | P-D02        | 15.19 | 3.07  | 12.42 | 60.82 | 8.5   |
| 17  | P-D03        | 14.51 | 3.09  | 11.8  | 62.24 | 8.36  |
| 18  | P-D04        | 16.35 | 2.77  | 8.64  | 62.98 | 9.26  |
| 19  | P-D05        | 15.18 | 2.95  | 12.18 | 60.81 | 8.88  |
| 20  | P-D06        | 15.1  | 2.69  | 12.82 | 60.01 | 9.38  |
| 21  | P-D07        | 15.3  | 2.52  | 8.63  | 63.6  | 9.95  |
| 22  | P-I01        | 16.67 | 2.37  | 8.4   | 63.59 | 8.97  |
| 23  | P-I02        | 16.18 | 3.37  | 9.28  | 62.35 | 8.82  |
| 24  | P-I03        | 15.21 | 3.24  | 6.94  | 63.59 | 11.02 |
| 25  | P-I04        | 15.17 | 3.51  | 10.74 | 60.5  | 10.08 |
| 26  | P-I05        | 14.73 | 3.19  | 13.25 | 60.94 | 7.89  |
| 27  | P-I06        | 17.94 | 2.97  | 4.3   | 66.16 | 8.63  |
| 28  | P-I07        | 15.97 | 3.72  | 9.39  | 60.24 | 10.68 |
| 29  | P-I08-W      | 16.21 | 2.34  | 8.25  | 65.49 | 7.71  |
| 30  | DanBaek      | 17.97 | 1.72  | 5.83  | 64.84 | 9.64  |
| 31  | DB-003       | 17.91 | 2.97  | 5.52  | 62.8  | 10.8  |
| 32  | DB-004       | 18.69 | 1.98  | 6.68  | 66.68 | 5.97  |
| 33  | DB-005       | 16.6  | 2.25  | 7.64  | 64.39 | 9.12  |
| 34  | DB-006       | 16.1  | 3.99  | 10.24 | 62.46 | 7.21  |
| 35  | DB-007       | 16.96 | 3.17  | 11.33 | 60.8  | 7.74  |
| 36  | DB-008       | 15.9  | 2.44  | 9.58  | 63.66 | 8.42  |
| 37  | DB-009       | 16.84 | 3.53  | 8.43  | 60.27 | 10.93 |
| 38  | DB-010       | 16.81 | 3.96  | 13.28 | 58.42 | 7.53  |
| 39  | DB-016       | 18.01 | 2.88  | 9.49  | 60.99 | 8.63  |
| 40  | DB-019       | 15.94 | 2.9   | 9.88  | 62.86 | 8.42  |

|    |        |       |      |       |       |       |
|----|--------|-------|------|-------|-------|-------|
| 41 | DB-024 | 17.5  | 3.2  | 10.28 | 60.94 | 8.08  |
| 42 | DB-026 | 15.06 | 1.48 | 12.64 | 62.82 | 8     |
| 43 | DB-027 | 13.44 | 2.43 | 9.94  | 63.25 | 10.94 |
| 44 | DB-029 | 13.58 | 2.87 | 12.01 | 62.14 | 9.4   |
| 45 | DB-030 | 14.86 | 2.84 | 11.21 | 61.88 | 9.21  |
| 46 | DB-031 | 14.75 | 2.55 | 9.64  | 63.04 | 10.02 |
| 47 | DB-033 | 14.17 | 2.27 | 12.37 | 61.7  | 9.49  |
| 48 | DB-034 | 14.45 | 3.09 | 11.44 | 61.27 | 9.75  |
| 49 | DB-035 | 14.57 | 3.51 | 10.39 | 61.31 | 10.22 |
| 50 | DB-036 | 13.23 | 2.72 | 13.08 | 62.47 | 8.5   |
| 51 | DB-037 | 15.4  | 3.14 | 10.47 | 62.08 | 8.91  |
| 52 | DB-038 | 14.96 | 3.4  | 9.94  | 62.66 | 9.04  |
| 53 | DB-039 | 15.37 | 2.28 | 11.43 | 61.22 | 9.7   |
| 54 | DB-040 | 14.55 | 2.45 | 9.27  | 63.45 | 10.28 |
| 55 | DB-041 | 19.38 | 1.81 | 0.38  | 68.69 | 9.74  |
| 56 | DB-044 | 18.88 | 2.8  | 3.58  | 65.99 | 8.75  |
| 57 | DB-045 | 19.03 | 2.6  | 5.19  | 64.8  | 8.38  |
| 58 | DB-046 | 17.36 | 3.11 | 6.7   | 65.25 | 7.58  |
| 59 | DB-049 | 17.13 | 3.19 | 6.75  | 64.51 | 8.42  |
| 60 | DB-050 | 16.82 | 3.07 | 7.51  | 64.18 | 8.42  |
| 61 | DB-051 | 17.03 | 2.62 | 8.63  | 62.13 | 9.59  |
| 62 | DB-054 | 17.75 | 3.56 | 4.99  | 63.96 | 9.74  |
| 63 | DB-056 | 16.15 | 2.75 | 8.82  | 64.32 | 7.96  |
| 64 | DB-058 | 16.21 | 4.12 | 8.51  | 63.92 | 7.24  |
| 65 | DB-059 | 19.59 | 2.58 | 7.52  | 60.82 | 9.49  |
| 66 | DB-060 | 20.64 | 2.11 | 6.89  | 62.16 | 8.2   |
| 67 | DB-061 | 17.59 | 0.99 | 8.47  | 65.52 | 7.43  |
| 68 | DB-062 | 16.82 | 2.15 | 8.25  | 62.92 | 9.86  |
| 69 | DB-063 | 17.57 | 1.46 | 6.07  | 66.18 | 8.72  |
| 70 | DB-064 | 17.3  | 1.83 | 5.52  | 65.74 | 9.61  |
| 71 | DB-065 | 18.34 | 2.11 | 7.87  | 64.17 | 7.51  |
| 72 | DB-066 | 15.44 | 2.47 | 8.63  | 62.91 | 10.55 |
| 73 | DB-067 | 16.32 | 2.56 | 8.27  | 63.44 | 9.41  |
| 74 | DB-068 | 16.11 | 1.88 | 4.83  | 66.35 | 10.83 |
| 75 | DB-069 | 16    | 3.42 | 9.76  | 62.83 | 7.99  |
| 76 | DB-072 | 15.4  | 2.37 | 10.95 | 62.02 | 9.26  |
| 77 | DB-073 | 16.25 | 2.52 | 11.43 | 61.2  | 8.6   |
| 78 | DB-074 | 13.87 | 2.61 | 12.42 | 61.45 | 9.65  |
| 79 | DB-075 | 15.69 | 2.55 | 15.43 | 57.53 | 8.8   |
| 80 | DB-076 | 15.14 | 2.97 | 14.06 | 59.77 | 8.06  |
| 81 | DB-077 | 15.87 | 2.69 | 11.01 | 60.01 | 10.42 |
| 82 | DB-078 | 15.68 | 2.34 | 10.94 | 62.6  | 8.44  |

|     |         |       |      |       |       |       |
|-----|---------|-------|------|-------|-------|-------|
| 83  | DB-079  | 16.12 | 2.58 | 10.56 | 62.23 | 8.51  |
| 84  | DB-080  | 16.29 | 2.83 | 11.89 | 60.75 | 8.24  |
| 85  | DB-083  | 14.7  | 2.28 | 8.88  | 64.17 | 9.97  |
| 86  | DB-085  | 14.79 | 2.87 | 13.54 | 59.9  | 8.9   |
| 87  | DB-086  | 13.41 | 2.55 | 13.45 | 60.88 | 9.71  |
| 88  | DB-087  | 13.01 | 2.19 | 11.87 | 61.5  | 11.43 |
| 89  | DB-088  | 12.46 | 1.47 | 10.53 | 61.54 | 14    |
| 90  | DB-089  | 13.62 | 2.23 | 7.66  | 64.3  | 12.19 |
| 91  | DB-090  | 14.14 | 1.61 | 12.04 | 62.77 | 9.44  |
| 92  | DB-091  | 14.66 | 1.93 | 10.99 | 64.17 | 8.25  |
| 93  | DB-092  | 17.75 | 2.51 | 6.73  | 63.28 | 9.73  |
| 94  | DB-093  | 18.34 | 2.38 | 7.79  | 62.22 | 9.27  |
| 95  | DaePung | 17.37 | 3.04 | 6.05  | 66.01 | 7.53  |
| 96  | DP-009  | 19.99 | 1.01 | 2.98  | 63.92 | 12.1  |
| 97  | DP-012  | 18.25 | 3.23 | 10.75 | 59.82 | 7.95  |
| 98  | DP-027  | 18.75 | 1.89 | 7.07  | 66.33 | 5.96  |
| 99  | DP-028  | 17.63 | 1.16 | 7.81  | 67.04 | 6.36  |
| 100 | DP-029  | 15.91 | 2.96 | 10.53 | 62.26 | 8.34  |
| 101 | DP-046  | 15.35 | 1.03 | 14.64 | 62.02 | 6.96  |
| 102 | DP-048  | 15.68 | 2.16 | 11.51 | 63.02 | 7.63  |
| 103 | DP-051  | 16.33 | 3.15 | 10.43 | 62.41 | 7.68  |
| 104 | DP-052  | 14.7  | 2.13 | 17.72 | 57.28 | 8.17  |
| 105 | DP-053  | 15.35 | 3.02 | 13.54 | 59.34 | 8.75  |
| 106 | DP-054  | 15.6  | 1.89 | 12.01 | 61.74 | 8.76  |
| 107 | DP-055  | 14.61 | 1.73 | 19.83 | 56.51 | 7.32  |
| 108 | DP-056  | 14.08 | 2.83 | 19.68 | 56.94 | 6.47  |
| 109 | DP-057  | 14.62 | 2.38 | 17.29 | 58.52 | 7.19  |
| 110 | DP-058  | 15.28 | 1.43 | 17.9  | 58.82 | 6.57  |
| 111 | DP-059  | 14.41 | 2.23 | 18.56 | 58.5  | 6.3   |
| 112 | DP-060  | 15.8  | 2.81 | 9.82  | 63.17 | 8.4   |
| 113 | DP-061  | 15.82 | 1.71 | 15.31 | 59.92 | 7.24  |
| 114 | DP-062  | 14.99 | 2.22 | 16.14 | 58.15 | 8.5   |
| 115 | DP-079  | 13.05 | 2.26 | 13.73 | 60.89 | 10.07 |
| 116 | DP-080  | 13.65 | 2.19 | 12.35 | 62.48 | 9.33  |
| 117 | DP-081  | 14.38 | 2.45 | 12.17 | 61.9  | 9.1   |
| 118 | DP-082  | 13.24 | 2.16 | 14.93 | 61.4  | 8.27  |
| 119 | DP-083  | 13.45 | 1.87 | 11.57 | 63.13 | 9.98  |
| 120 | DP-084  | 14.98 | 2.28 | 9.15  | 63.74 | 9.85  |
| 121 | DP-085  | 20.28 | 0.5  | 3.22  | 67.04 | 8.96  |
| 122 | DP-086  | 18.39 | 0    | 2.99  | 67.77 | 10.85 |
| 123 | DP-087  | 19.68 | 0.51 | 6.03  | 64.19 | 9.59  |
| 124 | DP-088  | 18.4  | 1.82 | 13.55 | 58.42 | 7.81  |

|     |           |       |      |       |       |       |
|-----|-----------|-------|------|-------|-------|-------|
| 125 | DP-089    | 16.72 | 2.23 | 13.36 | 60.19 | 7.5   |
| 126 | DP-090    | 17.65 | 0    | 1.54  | 72.74 | 8.07  |
| 127 | DP-091    | 15.73 | 0    | 6.77  | 68.82 | 8.68  |
| 128 | DP-092    | 17.19 | 2.7  | 2.83  | 66.63 | 10.65 |
| 129 | DP-093    | 17.98 | 0    | 4.39  | 71.44 | 6.19  |
| 130 | DP-094    | 15.64 | 1.64 | 7.65  | 67.47 | 7.6   |
| 131 | DP-095    | 16.71 | 0    | 8.86  | 67.21 | 7.22  |
| 132 | DP-097    | 16.02 | 0    | 6.71  | 68.02 | 9.25  |
| 133 | DP-098    | 15.01 | 0.72 | 14.72 | 62.25 | 7.3   |
| 134 | DP-104    | 17.87 | 0.5  | 6.24  | 66.65 | 8.74  |
| 135 | DP-106    | 16.22 | 1.26 | 8.13  | 64.02 | 10.37 |
| 136 | DP-107    | 16.75 | 0    | 8.06  | 65.04 | 10.15 |
| 137 | DP-111    | 15.29 | 0.8  | 9.61  | 64.53 | 9.77  |
| 138 | DP-114    | 15.98 | 1.1  | 7.75  | 65.86 | 9.31  |
| 139 | DP-117    | 15.91 | 1.93 | 10.21 | 62.46 | 9.49  |
| 140 | DP-120    | 16.68 | 1.09 | 12.88 | 58.86 | 10.49 |
| 141 | DP-121    | 14.95 | 2.57 | 12.19 | 60.53 | 9.76  |
| 142 | DP-127    | 16.15 | 2.61 | 7.74  | 65.44 | 8.06  |
| 143 | DP-129    | 14.68 | 1.94 | 14.12 | 62    | 7.26  |
| 144 | DP-131    | 15.94 | 1.26 | 10.35 | 61.86 | 10.59 |
| 145 | DP-132    | 15.48 | 1.75 | 11.38 | 63.79 | 7.6   |
| 146 | DP-140    | 16.38 | 1.65 | 9.28  | 62.87 | 9.82  |
| 147 | DP-152    | 13.96 | 1.76 | 11.86 | 64.82 | 7.6   |
| 148 | DP-172    | 15.73 | 0    | 6.72  | 67.62 | 9.93  |
| 149 | DP-178    | 18.81 | 0    | 5.19  | 66.99 | 9.01  |
| 150 | DP-179    | 19.73 | 0    | 4.51  | 69.24 | 6.52  |
| 151 | DP-183    | 18.32 | 0    | 7.27  | 66.88 | 7.53  |
| 152 | DP-184    | 18.26 | 0    | 3.81  | 71.42 | 6.51  |
| 153 | DP-190    | 16.63 | 0.1  | 4.25  | 73.4  | 5.62  |
| 154 | DP-192    | 15.84 | 2.73 | 7.59  | 64.89 | 8.95  |
| 155 | DP-200    | 16.42 | 0    | 6.71  | 70.95 | 5.92  |
| 156 | HwangKeum | 15.96 | 2.3  | 18.52 | 56.63 | 6.59  |
| 157 | HK-1      | 18.14 | 1.14 | 8.44  | 63.95 | 8.33  |
| 158 | HK-2      | 17.61 | 1.78 | 10.84 | 61.44 | 8.33  |
| 159 | HK-3      | 15.62 | 2.05 | 19.79 | 57.34 | 5.2   |
| 160 | HK-4      | 15.72 | 1.97 | 16.61 | 59.63 | 6.07  |
| 161 | HK-5      | 18.48 | 0.6  | 12.45 | 62.24 | 6.23  |
| 162 | HK-6      | 18.26 | 2.8  | 8.63  | 60.71 | 9.6   |
| 163 | HK-7      | 16.12 | 0.96 | 20.58 | 55.27 | 7.07  |
| 164 | HK-8      | 15.36 | 0.33 | 12.79 | 61.66 | 9.86  |
| 165 | HK-9      | 14.74 | 0    | 21.87 | 60.43 | 2.96  |
| 166 | HK-10     | 16.09 | 0    | 20.23 | 58.02 | 5.66  |

---

|     |          |       |      |       |       |       |
|-----|----------|-------|------|-------|-------|-------|
| 167 | HK-11    | 15.38 | 0.71 | 16.28 | 59.18 | 8.45  |
| 168 | HK-12    | 16.26 | 2.08 | 17.01 | 57.63 | 7.02  |
| 169 | HK-13    | 14.09 | 1.28 | 21.28 | 57.03 | 6.32  |
| 170 | HK-14    | 14.51 | 2.25 | 20.35 | 57.98 | 4.91  |
| 171 | HK-15    | 14.77 | 1.5  | 20.1  | 58.83 | 4.8   |
| 172 | HK-16    | 14.99 | 0.3  | 17.19 | 60.65 | 6.87  |
| 173 | HK-17    | 16.44 | 0.73 | 14.87 | 60.67 | 7.29  |
| 174 | HK-18    | 15.09 | 1.19 | 18.19 | 59.58 | 5.95  |
| 175 | HK-19    | 14.12 | 1.32 | 21.36 | 56.81 | 6.39  |
| 176 | HK-20    | 13.8  | 2.5  | 24.58 | 53.11 | 6.01  |
| 177 | HK-21    | 16.05 | 2.55 | 13.12 | 61.58 | 6.7   |
| 178 | HK-22    | 20.05 | 2.43 | 7.77  | 60.95 | 8.8   |
| 179 | HK-23    | 19.65 | 0.25 | 1.81  | 69.54 | 8.75  |
| 180 | HK-24    | 17.87 | 0    | 14.22 | 63.41 | 4.5   |
| 181 | HK-25    | 16.82 | 0    | 11.14 | 67.79 | 4.25  |
| 182 | HK-27    | 17.55 | 1    | 13.27 | 62.17 | 6.01  |
| 183 | HK-28    | 15.83 | 1.3  | 14.88 | 61.26 | 6.73  |
| 184 | HK-29    | 14.95 | 2.63 | 18.99 | 57.38 | 6.05  |
| 185 | HK-30    | 14.44 | 1.21 | 24.66 | 55.72 | 3.97  |
| 186 | HK-31    | 17.68 | 0    | 13.74 | 61.72 | 6.86  |
| 187 | HK-32    | 16.79 | 0    | 12.33 | 66.7  | 4.18  |
| 188 | HK-33    | 16.22 | 0    | 14.53 | 63.53 | 5.72  |
| 189 | HK-34    | 16.35 | 0    | 14.99 | 61.08 | 7.58  |
| 190 | HK-35    | 15.49 | 0    | 17.93 | 63.34 | 3.24  |
| 191 | HK-36    | 15.96 | 0    | 19.2  | 61.8  | 3.04  |
| 192 | HK-37    | 18.41 | 0    | 0.41  | 70.91 | 10.27 |
| 193 | HK-38    | 16.47 | 1.24 | 15.59 | 59.39 | 7.31  |
| 194 | HK-39    | 16.14 | 0    | 13.6  | 65.34 | 4.92  |
| 195 | HK-40    | 16.39 | 0    | 20.18 | 62.43 | 1     |
| 196 | HK-41    | 15.72 | 0    | 21.93 | 57.95 | 4.4   |
| 197 | HK-42    | 15.36 | 0    | 5.93  | 65.43 | 13.28 |
| 198 | HK-43    | 13.89 | 3.96 | 22.43 | 53.58 | 6.14  |
| 199 | HK-44    | 15.67 | 0    | 10.39 | 68.53 | 5.41  |
| 200 | HK-45    | 14.35 | 1.96 | 22.1  | 56.44 | 5.15  |
| 201 | HK-46    | 21    | 0    | 8.03  | 64.08 | 6.89  |
| 202 | HK-47    | 13.15 | 1.23 | 23.34 | 57.11 | 5.17  |
| 203 | HK-48    | 12.42 | 2.19 | 22.06 | 57.43 | 5.9   |
| 204 | HK-49    | 18.59 | 0    | 11.15 | 66.73 | 3.53  |
| 205 | HK-50    | 16.65 | 0.72 | 2.29  | 74.7  | 5.64  |
| 206 | HK-60    | 17.19 | 0    | 9.05  | 66.62 | 7.14  |
| 207 | HK25-78  | 16.95 | 5.84 | 7.89  | 66.3  | 3.02  |
| 208 | HK25-165 | 16.37 | 7.49 | 6.87  | 64.6  | 4.67  |

---
