# Supplementary material for: Differential Gene Expression Associated with Altered Isoflavone and Fatty Acid Contents in Soybean Mutant Diversity Pool
Source: MDPI journal article supplement (doi:10.3390/plants10061037), 2021-05-21
Supplement: s1 [file s1]

Table S. Total isoflavone content in the seeds of 208 soybean MDP lines.

| No. | Lines        | Total<br>isoflavone<br>content | No. | Lines  | Total<br>isoflavone<br>content |
|-----|--------------|--------------------------------|-----|--------|--------------------------------|
| 1   | 94seori      | 1.97                           | 105 | DP-053 | 3.69                           |
| 2   | Joseangseori | 1.27                           | 106 | DP-054 | 4.63                           |
| 3   | J-S          | 2.42                           | 107 | DP-055 | 5.25                           |
| 4   | J-D01        | 1.53                           | 108 | DP-056 | 5.78                           |
| 5   | J-D02        | 1.89                           | 109 | DP-057 | 4.11                           |
| 6   | KAS360-22    | 0.88                           | 110 | DP-058 | 4.39                           |
| 7   | KAS360-22-W  | 2.02                           | 111 | DP-059 | 5.55                           |
| 8   | BangSa       | 2.26                           | 112 | DP-060 | 3.16                           |
| 9   | BS-25        | 1.51                           | 113 | DP-061 | 5.56                           |
| 10  | BS-63        | 1.07                           | 114 | DP-062 | 4.38                           |
| 11  | BS-73        | 1.14                           | 115 | DP-079 | 6.98                           |
| 12  | BS-74        | 1.15                           | 116 | DP-080 | 6.68                           |
| 13  | BS-84        | 1.05                           | 117 | DP-081 | 5.8                            |
| 14  | PalDal       | 2.31                           | 118 | DP-082 | 4.24                           |
| 15  | P-D01        | 2.35                           | 119 | DP-083 | 5                              |
| 16  | P-D02        | 1.52                           | 120 | DP-084 | 7.08                           |
| 17  | P-D03        | 2.4                            | 121 | DP-085 | 5.85                           |
| 18  | P-D04        | 1.81                           | 122 | DP-086 | 5.9                            |
| 19  | P-D05        | 1.81                           | 123 | DP-087 | 3.83                           |
| 20  | P-D06        | 1.88                           | 124 | DP-088 | 3.47                           |
| 21  | P-D07        | 1.14                           | 125 | DP-089 | 5.66                           |
| 22  | P-I01        | 1.27                           | 126 | DP-090 | 6.55                           |
| 23  | P-I02        | 2.27                           | 127 | DP-091 | 5.33                           |
| 24  | P-I03        | 2.93                           | 128 | DP-092 | 4.14                           |
| 25  | P-I04        | 3.47                           | 129 | DP-093 | 2.51                           |
| 26  | P-I05        | 3.6                            | 130 | DP-094 | 3.05                           |
| 27  | P-I06        | 2.46                           | 131 | DP-095 | 3.32                           |
| 28  | P-I07        | 3.91                           | 132 | DP-097 | 4.24                           |
| 29  | P-I08-W      | 4.07                           | 133 | DP-098 | 2.85                           |
| 30  | DanBaek      | 1.03                           | 134 | DP-104 | 4.08                           |
| 31  | DB-003       | 1.29                           | 135 | DP-106 | 3.54                           |
| 32  | DB-004       | 2.34                           | 136 | DP-107 | 1.47                           |
| 33  | DB-005       | 1.85                           | 137 | DP-111 | 4.56                           |
| 34  | DB-006       | 1.61                           | 138 | DP-114 | 5.04                           |
| 35  | DB-007       | 2.48                           | 139 | DP-117 | 2.89                           |
| 36  | DB-008       | 2.27                           | 140 | DP-120 | 3.94                           |
| 37  | DB-009       | 4.59                           | 141 | DP-121 | 4.26                           |

|    |        |      |     |           |      |
|----|--------|------|-----|-----------|------|
| 38 | DB-010 | 1.9  | 142 | DP-127    | 4.01 |
| 39 | DB-016 | 2.69 | 143 | DP-129    | 2.85 |
| 40 | DB-019 | 3.24 | 144 | DP-131    | 4.35 |
| 41 | DB-024 | 3    | 145 | DP-132    | 2.14 |
| 42 | DB-026 | 2.51 | 146 | DP-140    | 3.23 |
| 43 | DB-027 | 3.62 | 147 | DP-152    | 3.29 |
| 44 | DB-029 | 3.47 | 148 | DP-172    | 3.27 |
| 45 | DB-030 | 4.01 | 149 | DP-178    | 3.11 |
| 46 | DB-031 | 4    | 150 | DP-179    | 2.83 |
| 47 | DB-033 | 3.58 | 151 | DP-183    | 3.98 |
| 48 | DB-034 | 3.71 | 152 | DP-184    | 3.82 |
| 49 | DB-035 | 6.63 | 153 | DP-190    | 2.19 |
| 50 | DB-036 | 5.11 | 154 | DP-192    | 4.16 |
| 51 | DB-037 | 2.78 | 155 | DP-200    | 3.22 |
| 52 | DB-038 | 4.11 | 156 | HwangKeum | 1.85 |
| 53 | DB-039 | 4.88 | 157 | HK-1      | 2.37 |
| 54 | DB-040 | 2.73 | 158 | HK-2      | 2.88 |
| 55 | DB-041 | 4.73 | 159 | HK-3      | 2.65 |
| 56 | DB-044 | 3.51 | 160 | HK-4      | 2.24 |
| 57 | DB-045 | 3.45 | 161 | HK-5      | 2    |
| 58 | DB-046 | 4.6  | 162 | HK-6      | 2.68 |
| 59 | DB-049 | 6.76 | 163 | HK-7      | 2.57 |
| 60 | DB-050 | 4.2  | 164 | HK-8      | 3.13 |
| 61 | DB-051 | 6.34 | 165 | HK-9      | 2.24 |
| 62 | DB-054 | 3.99 | 166 | HK-10     | 2.56 |
| 63 | DB-056 | 2.7  | 167 | HK-11     | 2.31 |
| 64 | DB-058 | 3.5  | 168 | HK-12     | 2.64 |
| 65 | DB-059 | 2.15 | 169 | HK-13     | 2.4  |
| 66 | DB-060 | 1.48 | 170 | HK-14     | 2.36 |
| 67 | DB-061 | 2.54 | 171 | HK-15     | 1.92 |
| 68 | DB-062 | 2.31 | 172 | HK-16     | 1.86 |
| 69 | DB-063 | 2.46 | 173 | HK-17     | 3.21 |
| 70 | DB-064 | 1.34 | 174 | HK-18     | 2.49 |
| 71 | DB-065 | 2.86 | 175 | HK-19     | 1.95 |
| 72 | DB-066 | 2.23 | 176 | HK-20     | 2.11 |
| 73 | DB-067 | 3.85 | 177 | HK-21     | 1.52 |
| 74 | DB-068 | 2.95 | 178 | HK-22     | 1.37 |
| 75 | DB-069 | 1.2  | 179 | HK-23     | 1.61 |
| 76 | DB-072 | 4.2  | 180 | HK-24     | 1.61 |
| 77 | DB-073 | 1.8  | 181 | HK-25     | 1.85 |
| 78 | DB-074 | 3.67 | 182 | HK-27     | 1.58 |
| 79 | DB-075 | 2.36 | 183 | HK-28     | 1.36 |

---

|     |         |      |     |          |      |
|-----|---------|------|-----|----------|------|
| 80  | DB-076  | 2.77 | 184 | HK-29    | 1.37 |
| 81  | DB-077  | 2.23 | 185 | HK-30    | 1.64 |
| 82  | DB-078  | 4.48 | 186 | HK-31    | 2.07 |
| 83  | DB-079  | 2.42 | 187 | HK-32    | 2.11 |
| 84  | DB-080  | 2.6  | 188 | HK-33    | 1.93 |
| 85  | DB-083  | 4.34 | 189 | HK-34    | 2.01 |
| 86  | DB-085  | 3.21 | 190 | HK-35    | 2.35 |
| 87  | DB-086  | 7.11 | 191 | HK-36    | 2.48 |
| 88  | DB-087  | 4.2  | 192 | HK-37    | 1.4  |
| 89  | DB-088  | 7.12 | 193 | HK-38    | 3.06 |
| 90  | DB-089  | 6.71 | 194 | HK-39    | 1.52 |
| 91  | DB-090  | 4.01 | 195 | HK-40    | 2.22 |
| 92  | DB-091  | 3.19 | 196 | HK-41    | 2.07 |
| 93  | DB-092  | 4.45 | 197 | HK-42    | 2.15 |
| 94  | DB-093  | 3.39 | 198 | HK-43    | 3.14 |
| 95  | DaePung | 4.95 | 199 | HK-44    | 2.19 |
| 96  | DP-009  | 1.59 | 200 | HK-45    | 2.16 |
| 97  | DP-012  | 3.69 | 201 | HK-46    | 1.47 |
| 98  | DP-027  | 2.97 | 202 | HK-47    | 1.6  |
| 99  | DP-028  | 3.96 | 203 | HK-48    | 1.45 |
| 100 | DP-029  | 3.8  | 204 | HK-49    | 1.56 |
| 101 | DP-046  | 2.62 | 205 | HK-50    | 1.3  |
| 102 | DP-048  | 3.26 | 206 | HK-60    | 1.87 |
| 103 | DP-051  | 5.04 | 207 | HK25-78  | 1.08 |
| 104 | DP-052  | 2.71 | 208 | HK25-165 | 1.18 |

---
