# Supplementary material for: Differential Gene Expression Associated with Altered Isoflavone and Fatty Acid Contents in Soybean Mutant Diversity Pool
Source: MDPI journal article supplement (doi:10.3390/plants10061037), 2021-05-21
Supplement: s1 [file s1]

Table S4. Primer pairs used for quantitative real-time PCR analysis (fatty acid biosynthesis genes).

| Name    | Locus tag              | Description                              | Forward primer       | Reverse primer        |
|---------|------------------------|------------------------------------------|----------------------|-----------------------|
| FAD2-1A | <i>Glyma.10g278000</i> | omega-6 fatty acid desaturase            | GCAAGCCACTACCACCCTTA | ACATAGCAGCCAAACCAACC  |
| FAD2-1B | <i>Glyma.20g111000</i> | omega-6 fatty acid desaturase            | TCCCAAACCAAAATCCAAA  | TGGGAGCATAAGGGTGGTAG  |
| FAD2-2A | <i>Glyma.19g147300</i> | omega-6 fatty acid desaturase            | TTGGCCTTGTTCTCCACTCT | TGTAGCGTCCATTGCATGAT  |
| FAD2-2B | <i>Glyma.19g147400</i> | omega-6 fatty acid desaturase            | TTGTTGGCCTTATCCTCCAC | GACTCTGCCTGGTGGATTGT  |
| FAD2-2C | <i>Glyma.03g144500</i> | omega-6 fatty acid desaturase            | TGTTCTCCACAATGCCACAT | CACATTGCCTTGACAAATGG  |
| FAD2-2D | <i>Glyma.09g111900</i> | omega-6 fatty acid desaturase            | AACTCACCAGGGAGGGTTCT | GGGGCCATAAGGGTCATAGT  |
| SACPD-A | <i>Glyma.07g207200</i> | stearoyl-acyl carrier protein desaturase | GCAGCTAACCGGACTTTCAG | TTGACGACTCCTTGCCCTCTT |
| SACPD-B | <i>Glyma.02g138100</i> | stearoyl-acyl carrier protein desaturase | TGAGAAACGCCATGAGACTG | CCGTCATACATGAGGTGTGC  |
| SACPD-C | <i>Glyma.14g121400</i> | stearoyl-acyl carrier protein desaturase | GAACGGTGGAGATTGGAGAA | TGAACTTAACGCCATGATGC  |
| FAD6    | <i>Glyma.02g203300</i> | omega-6 fatty acid desaturase            | CTCCAAGAAAAGTGGGGACA | GGCATGGTTTCCTTCAAAAA  |
| ACT1A   | <i>Glyma.09g34110</i>  | Glycerol-3-phosphate acyltransferase     | CTTAAGCAGGGGCACAACAT | CCGGCTACATAGGTCATGCT  |
| ACT1B   | <i>Glyma.01g01800</i>  | Glycerol-3-phosphate acyltransferase     | TAGTCTGGATTGCCCCAAGT | GCACAATATCGCCAAAGGAT  |
| ELF1B   | <i>Glyma.02g44460</i>  | Eukaryotic elongation factor 1 b         | GTTGAAAAGCCAGGGGACA  | TCTTACCCCTTGAGCGTGG   |
