# Supplementary material for: Differential Gene Expression Associated with Altered Isoflavone and Fatty Acid Contents in Soybean Mutant Diversity Pool
Source: MDPI journal article supplement (doi:10.3390/plants10061037), 2021-05-21
Supplement: s1 [file s1]

Table S3. Primer pairs used for quantitative real-time PCR analysis (isoflavone biosynthesis genes).

| Name    | Locus tag                | Description                                            | Forward primer             | Reverse primer               |
|---------|--------------------------|--------------------------------------------------------|----------------------------|------------------------------|
| Gm4CL   | <i>Glyma</i> . 01g232400 | 4-coumarate:CoA ligase                                 | AGGCAATGTACGTGGACAAGCT     | TCCGAGAGGACAGAGAAGTGGA       |
| GmCHS1  | <i>Glyma</i> . 08g109400 | Chalcone synthase 1                                    | AAGCGCATGTGTGATAAGTCGA     | TTGCATCCAACGAAGGTGC          |
| GmCHS7  | <i>Glyma</i> . 01g228700 | Chalcone synthase 7                                    | AACCCACCAAACCGTGTTGAT      | CTTGTCACACATGCGCTGAAAT       |
| GmCHI1A | <i>Glyma</i> . 20g241500 | Chalcone isomerase 1A Type II                          | GGCGCTGAATACTCAAAGAAGG     | AGAGGCACCAGGTGCAAAATT        |
| GmIFS1  | <i>Glyma</i> . 07g202300 | Isoflavone synthase 1                                  | AGAATTCCGTCCCGAGAGGTT      | TGCCATTCTGAAGTAGCCAA         |
| GmIFS2  | <i>Glyma</i> . 13g173500 | Isoflavone synthase 2                                  | AATGTGCCCTGGAGTCAATCTG     | GGCGTCACCACCCTTCAATAT        |
| GmF3H   | <i>Glyma</i> . 02g048400 | Flavanone 3-hydroxylase                                | CCGTTTGTCCATAGCCACTT       | GCCTCAAGTTTTGCCTTCTG         |
| GmMT7   | <i>Glyma</i> . 13g056100 | isoflavone-7-O-B-glucoside 6"-<br>O-malonyltransferase | GGCTATTTCGATAGGAATAACAAGCC | GTAGTGAAAACAGCAACGGTTCT<br>T |
| GmMaT1  | <i>Glyma</i> . 18g268200 | malonyl-transferase                                    | ATAGAGGAGCAGAATCAGAGCC     | CAATCCACTGTGAACGCAAA         |
| GmMaT3  | <i>Glyma</i> . 13g056100 | malonyl-transferase                                    | TAACAACCACCGCCGAAAC        | ACAAATATGCGCCCACGAT          |
| GmUGT1  | <i>Glyma</i> . 16g175600 | glycosyl-transferase                                   | ACATCACGTGCTTCGTTGGA       | TGCCAAAGAGCTAACAGGC          |
| GmUGT9  | <i>Glyma</i> . 09g127200 | glycosyl-transferase                                   | AGCGAAAGCAGAAGAAGGG        | GACGAGTATTACATGGGGTTAAG<br>C |

---

|         |                        |                                  |                     |                     |
|---------|------------------------|----------------------------------|---------------------|---------------------|
| GmELF1B | <i>Glyma. 02g44460</i> | Eukaryotic elongation factor 1 b | GTTGAAAAGCCAGGGGACA | TCTTACCCCTTGAGCGTGG |
|---------|------------------------|----------------------------------|---------------------|---------------------|

---
